# Supplementary material for: Neuropathic pain phenotyping by international consensus (NeuroPPIC) for genetic studies: a NeuPSIG systematic review, Delphi survey, and expert panel recommendations
Source: PubMed Central journal article supplement (PMC4747983; doi:10.1097/j.pain.0000000000000335), 2015-10-22
Supplement: jop-156-2337-s001.pdf [file jop-156-2337-s001.pdf]

## Supplementary Digital Content 1

**Table. Sample search strategy (January 1966 to April 2014)**

| <b>Search number</b> | <b>Term(s)</b>                                                                           |
|----------------------|------------------------------------------------------------------------------------------|
| 1.                   | polymorphism.af                                                                          |
| 2.                   | SNP.af                                                                                   |
| 3.                   | single nucleotide polymorphism.af                                                        |
| 4.                   | genetics.af                                                                              |
| 5.                   | genet*.af                                                                                |
| 6.                   | GWAS.af                                                                                  |
| 7.                   | Genome-Wide Association Study.af                                                         |
| 8.                   | genetic predisposition to disease.af                                                     |
| 9.                   | candidate genes.af                                                                       |
| 10.                  | allele.af                                                                                |
| 11.                  | genotype.af                                                                              |
| 12.                  | genetic association studies.af                                                           |
| 13.                  | 1 or 2 or 3 or 4 or 5 or 6 or 7 or 8 or 9 or 10 or 11 or 12                              |
| 14.                  | neuropath*pain.af                                                                        |
| 15.                  | neurogenic pain.af                                                                       |
| 16.                  | deafferentation pain.af                                                                  |
| 17.                  | (neuropath* adj5 pain).af                                                                |
| 18.                  | (neurogenic adj5 pain).af                                                                |
| 19.                  | (deafferentation adj5 pain).af                                                           |
| 20.                  | neuralgia.af                                                                             |
| 21.                  | nerve pain.af                                                                            |
| 22.                  | (nerve dysfunction or nerve damage or nerve destruction or somatosensory dysfunction).af |
| 23.                  | peripheral neuropath*.af                                                                 |
| 24.                  | peripheral nerve injur*.af                                                               |
| 25.                  | central neuropath*.af                                                                    |
| 26.                  | central nerve injur*.af                                                                  |
| 27.                  | polyneuropathy*.af                                                                       |
| 28.                  | pain.af                                                                                  |
| 29.                  | 14 or 15 or 16 or 17 or 18 or 19 or 20 or 21 or 22 or 23 or 24 or 25 or 26 or 27         |
| 30.                  | 13 and 28 and 39                                                                         |
