# Supplementary material for: Neuropathic pain phenotyping by international consensus (NeuroPPIC) for genetic studies: a NeuPSIG systematic review, Delphi survey, and expert panel recommendations
Source: PubMed Central journal article supplement (PMC4747983; doi:10.1097/j.pain.0000000000000335), 2015-10-22
Supplement: jop-156-2337-s002.pdf [file jop-156-2337-s002.pdf]

## Supplementary Digital Content 2

Table. Systematic review: phenotyping methods reported in the article text<sup>a</sup>

|                                                      | Reference |     |     |     |                   |      |                   |      |      |      |      |      |      |      |      |      |      |      |      |      |      |   |
|------------------------------------------------------|-----------|-----|-----|-----|-------------------|------|-------------------|------|------|------|------|------|------|------|------|------|------|------|------|------|------|---|
|                                                      | [2]       | [4] | [6] | [8] | [11] <sup>b</sup> | [12] | [14] <sup>c</sup> | [15] | [20] | [21] | [22] | [23] | [27] | [35] | [36] | [37] | [41] | [43] | [46] | [47] | [49] |   |
| <b>Clinical examination<sup>d</sup></b>              |           |     |     |     |                   |      |                   |      |      |      |      |      |      |      |      |      |      |      |      |      |      |   |
| • Brief description                                  |           |     | ●   |     | ○                 |      | ○                 | ●    |      |      |      |      |      |      | ●    |      | ●    |      |      |      | ●    |   |
| • Detailed description                               |           |     |     | ●   |                   | ●    |                   |      | ●    | ●    | ●    | ●    | ●    |      |      |      |      |      |      |      | ●    |   |
| <b>Pain rating scale</b>                             |           |     |     | ●   | ○                 |      | ○                 | ●    | ●    | ●    | ●    | ●    | ●    |      | ●    |      |      |      | ●    |      | ●    | ● |
| <b>History<sup>d</sup></b>                           |           |     |     |     |                   |      |                   |      |      |      |      |      |      |      |      |      |      |      |      |      |      |   |
| • Brief                                              | ●         |     |     |     | ○                 |      | ○                 | ●    |      |      |      |      |      | ●    |      | ●    |      | ●    | ●    | ●    |      |   |
| • Detailed                                           |           |     |     | ●   |                   | ●    |                   |      |      | ●    |      |      |      |      |      |      |      |      |      |      | ●    |   |
| <b>Radiological imaging (MRI)</b>                    |           |     |     |     | ○                 | ●    | ○                 | ●    | ●    |      | ●    | ●    | ●    |      | ●    |      |      |      |      |      | ●    |   |
| <b>Neuropathic pain identification questionnaire</b> |           |     |     |     |                   | ●    | ○                 |      | ●    |      | ●    | ●    |      |      |      |      |      |      |      |      |      |   |
| <b>Quantitative sensory testing (QST)</b>            |           | ●   | ●   |     |                   | ●    |                   |      | ●    |      |      |      |      |      |      |      |      |      |      | ●    |      |   |
| <b>Nerve conduction studies (NCS)</b>                |           |     |     |     |                   | ●    |                   |      |      |      |      |      |      |      |      |      |      |      |      | ●    |      |   |
| <b>Intra-epidermal nerve fibre density (IENFD)</b>   |           |     |     |     |                   | ●    |                   |      |      |      |      |      |      |      |      |      |      |      |      | ●    |      |   |
| <b>Inflammatory markers</b>                          |           |     |     |     |                   | ●    |                   |      | ●    |      |      |      |      |      |      |      |      |      |      |      |      |   |
| <b>Body chart</b>                                    |           |     |     |     |                   |      |                   | ●    |      |      |      |      |      |      |      |      |      |      |      |      |      |   |
| <b>Psychological measures (HADS)</b>                 |           |     |     |     |                   |      |                   |      | ●    |      |      |      |      |      |      |      |      |      |      |      |      |   |

<sup>a</sup> Open circles relate to studies reporting on multiple cohorts, with different phenotyping methods described for each cohort;

<sup>b</sup> Costigan et al., 2010 [11]: Six independent cohorts each with different phenotyping methods;

<sup>c</sup> Dominguez et al., 2013 [14]: Two independent cohorts each with different phenotyping methods;

<sup>d</sup> 'brief' and 'detailed' describe the level of detail provided in the text of the paper, not necessarily that the assessment was 'brief' or 'detailed';

MRI: Magnetic resonance imaging;

HADS: Hospital Anxiety and Depression Scale
