# Supplementary material for: Neuropathic pain phenotyping by international consensus (NeuroPPIC) for genetic studies: a NeuPSIG systematic review, Delphi survey, and expert panel recommendations
Source: PubMed Central journal article supplement (PMC4747983; doi:10.1097/j.pain.0000000000000335), 2015-10-22
Supplement: jop-156-2337-s003.pdf [file jop-156-2337-s003.pdf]

## **Supplementary Digital Content 3**

Figure. Delphi survey: level of agreement on whether symptoms (page 2), clinical signs (page 3), and additional investigations (page 4) were: (1) sensitive methods of detecting neuropathic pain, (2) specific methods for detecting neuropathic pain, (3) feasible for a non-specialist to assess in a research setting, and (4) feasible for study participants to self-assess symptoms and clinical signs.

# Symptoms

(NP: neuropathic pain)

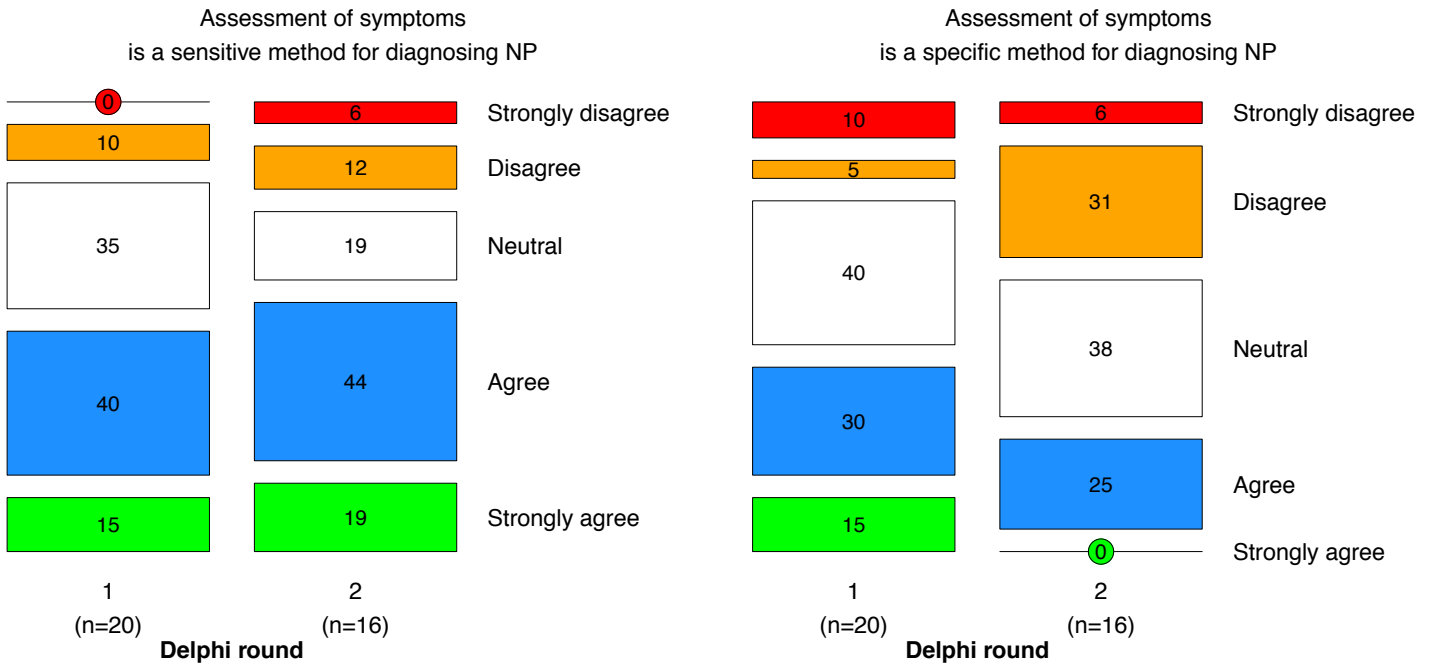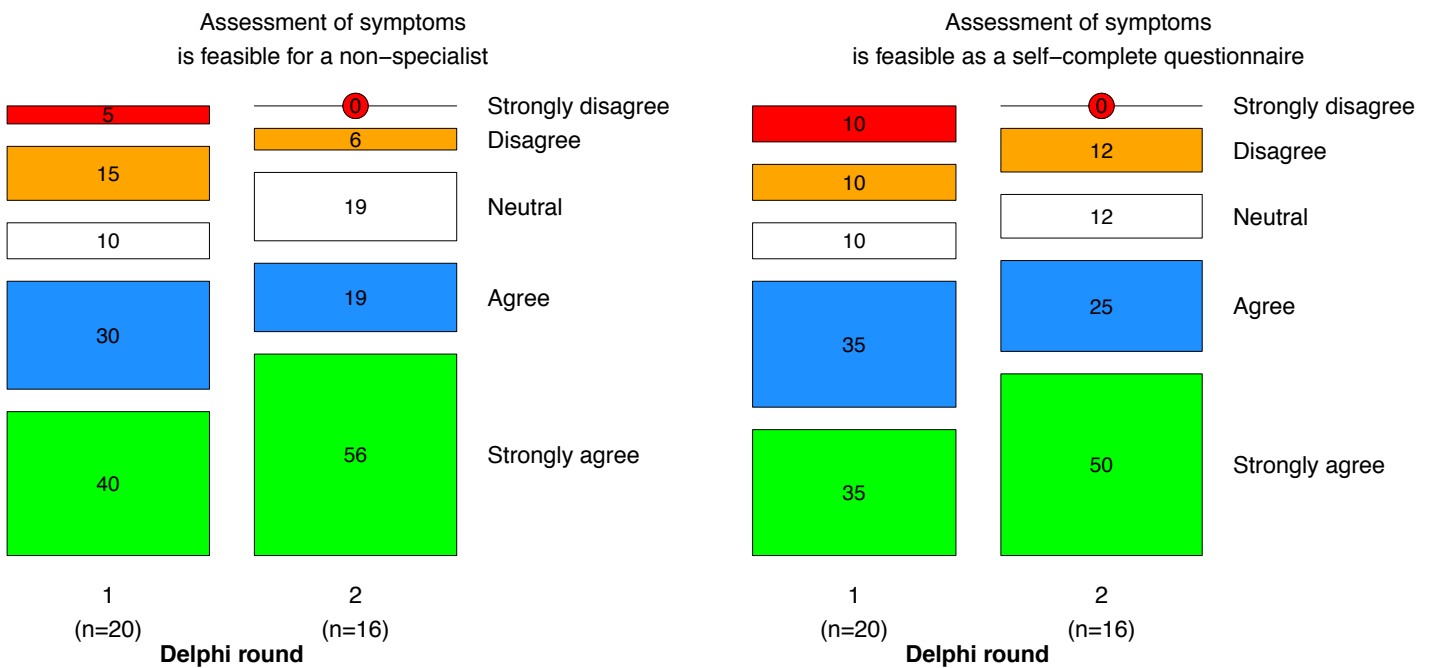

Numbers in the blocks report percent respondents choosing a category  
 Note: percentages may not match those presented in Table 1 because of rounding

# Clinical signs

(NP: neuropathic pain)

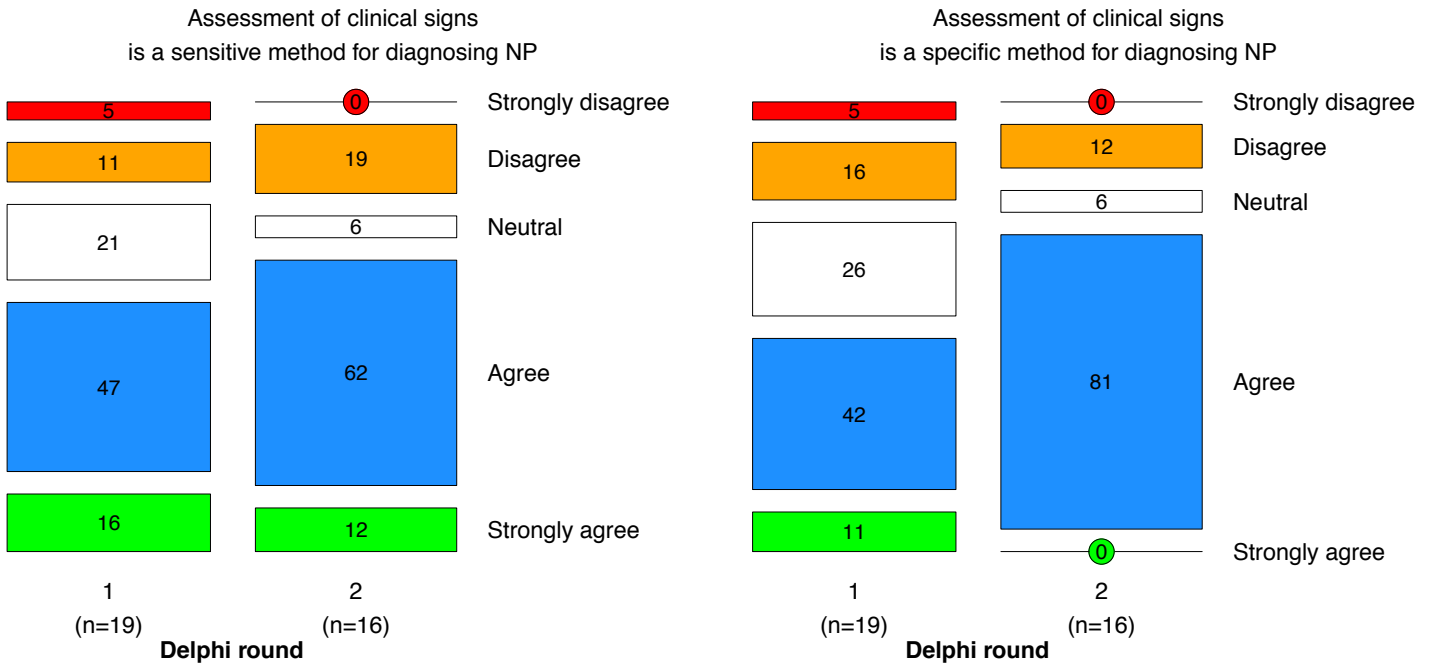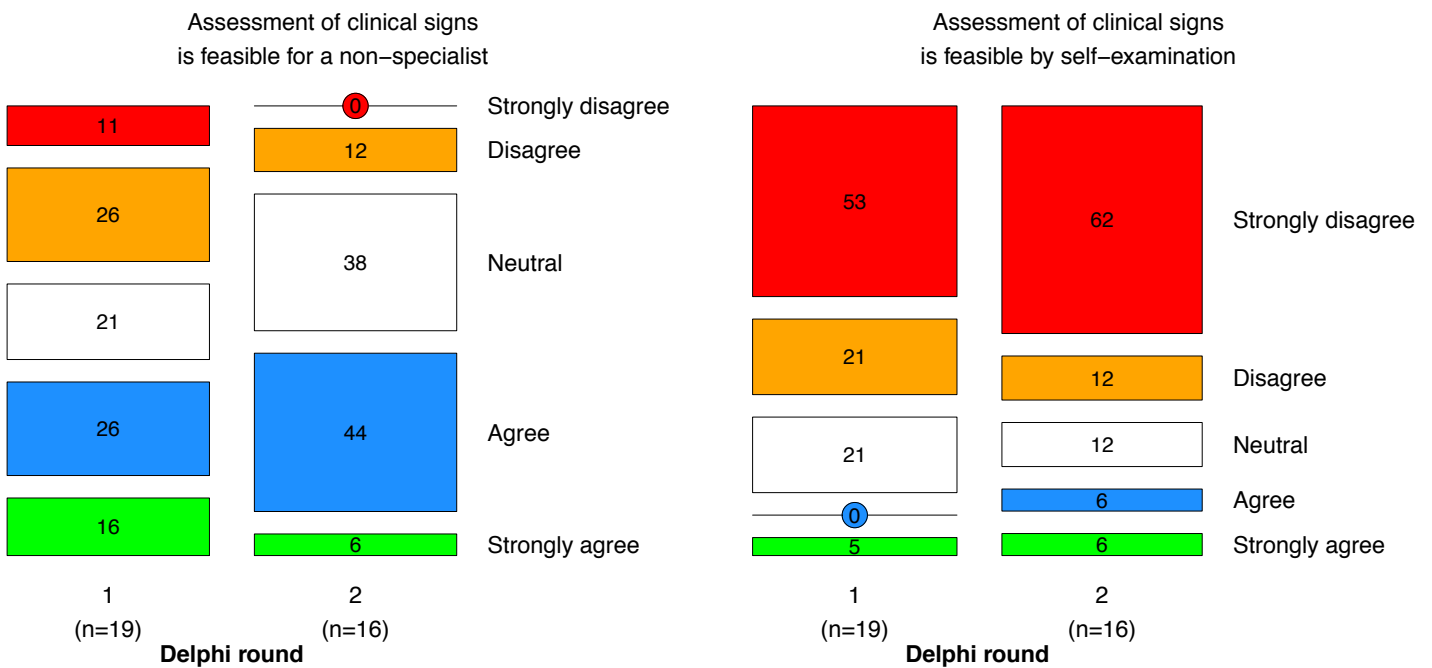

Numbers in the blocks report percent respondents choosing a category  
 Note: percentages may not match those presented in Table 1 because of rounding

# Additional investigations

(NP: neuropathic pain)

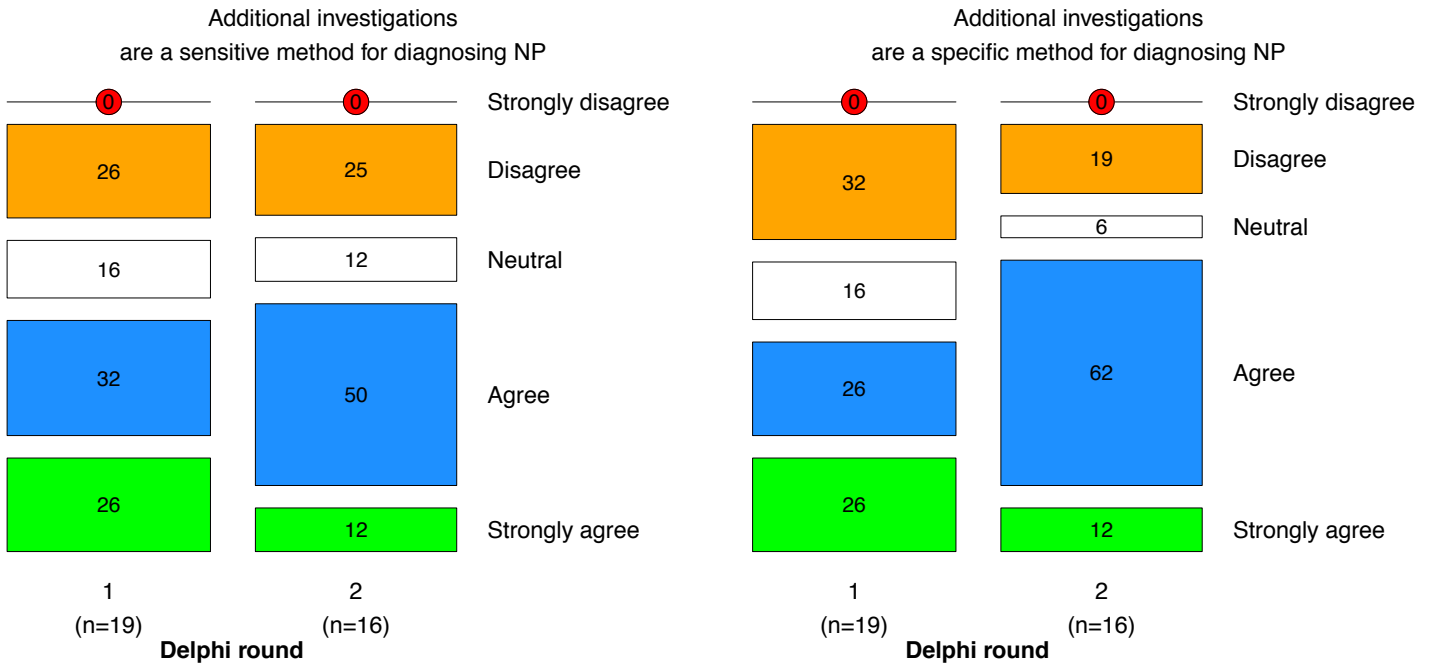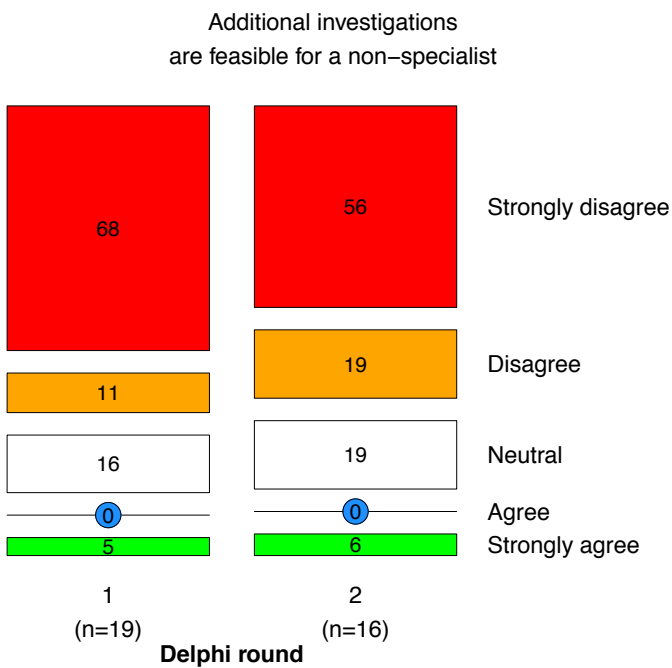

Numbers in the blocks report percent respondents choosing a category  
 Note: percentages may not match those presented in Table 1 because of rounding
