# Supplementary material for: Neuropathic pain phenotyping by international consensus (NeuroPPIC) for genetic studies: a NeuPSIG systematic review, Delphi survey, and expert panel recommendations
Source: PubMed Central journal article supplement (PMC4747983; doi:10.1097/j.pain.0000000000000335), 2015-10-22

## **Supplementary Digital Content 4**

Figure. Delphi survey: level of diagnostic certainty achieved by individual assessment types and combinations of these assessments when assessing whether a pain is 'definite', 'probable' or 'possible' neuropathic pain

Rate the level of diagnostic certainty of:  
 additional investigations, clinical signs, symptoms,  
 and body chart and history

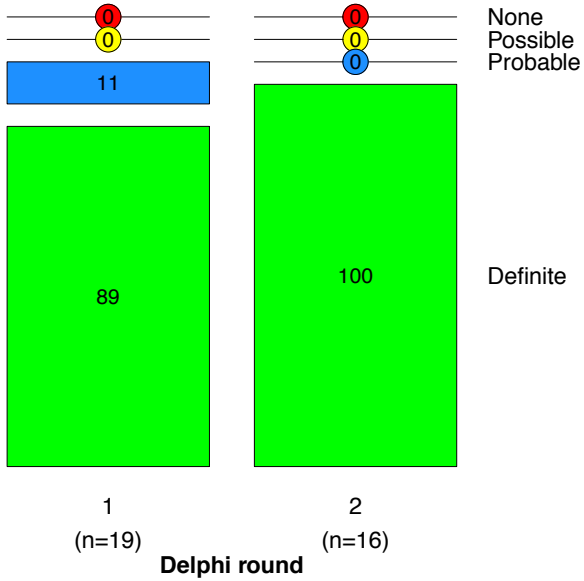

Rate the level of diagnostic certainty of:  
 additional investigations, clinical signs, and symptoms

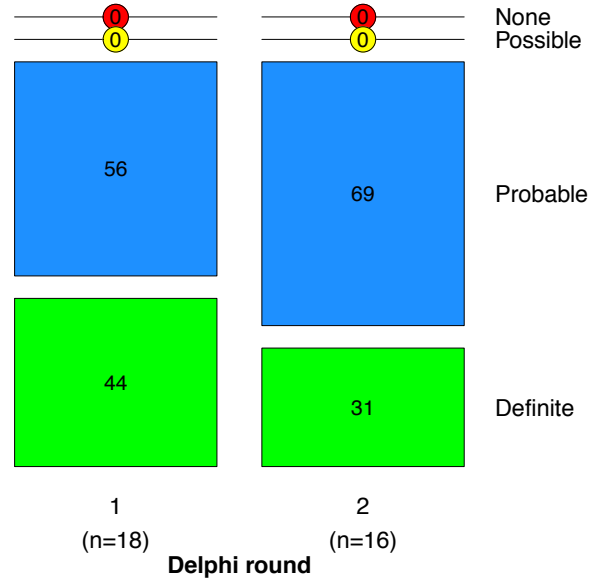

Rate the level of diagnostic certainty of:  
 clinical signs, symptoms, body chart and history

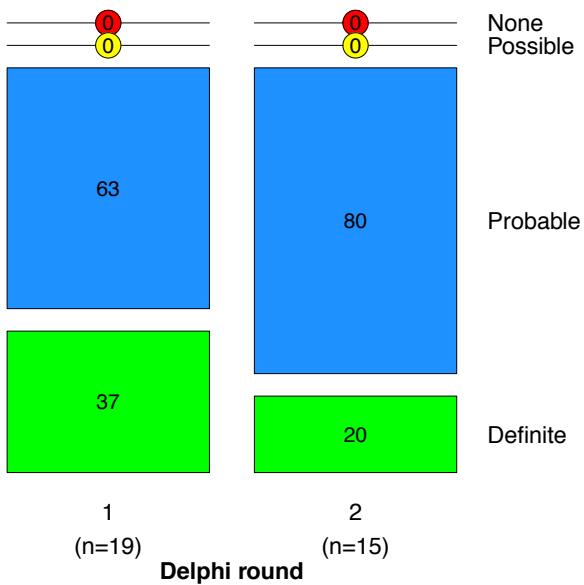

Rate the level of diagnostic certainty of:  
 clinical signs and symptoms

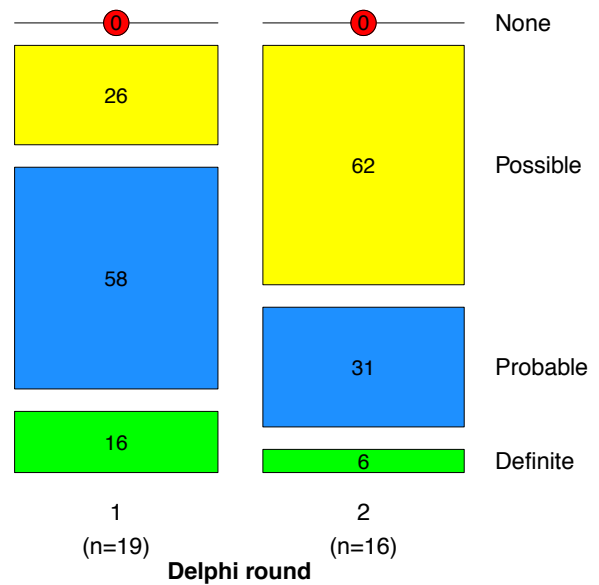

Rate the level of diagnostic certainty of:  
additional investigations and clinical signs

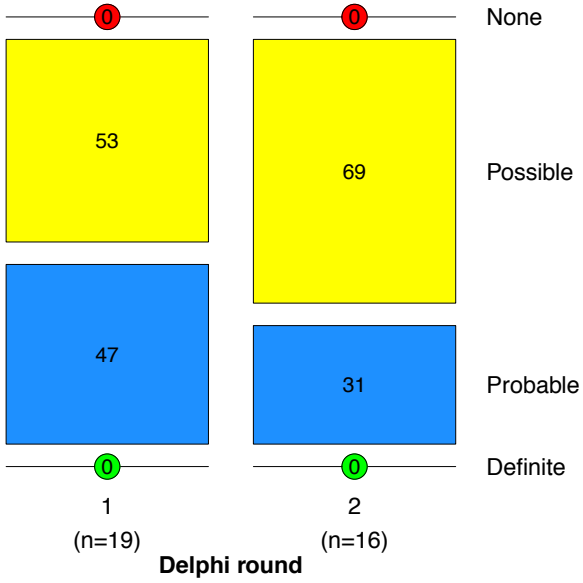

Rate the level of diagnostic certainty of:  
symptoms, body chart and history

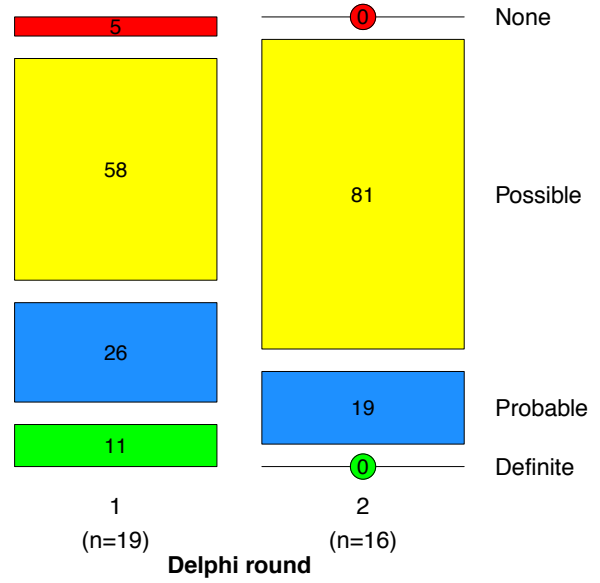

Rate the level of diagnostic certainty of:  
clinical signs only

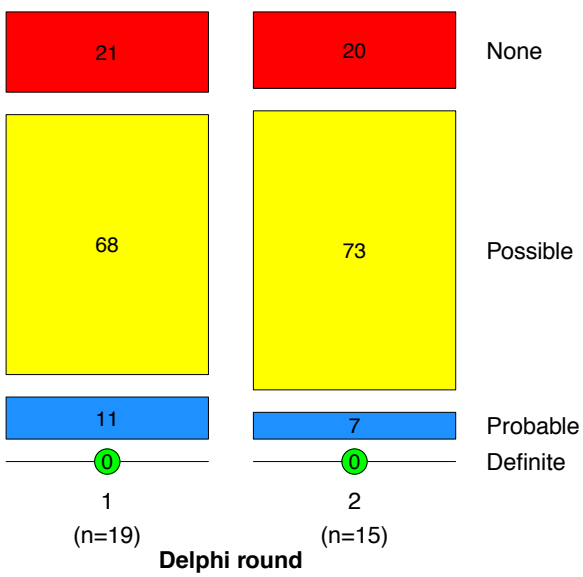

Rate the level of diagnostic certainty of:  
symptoms only

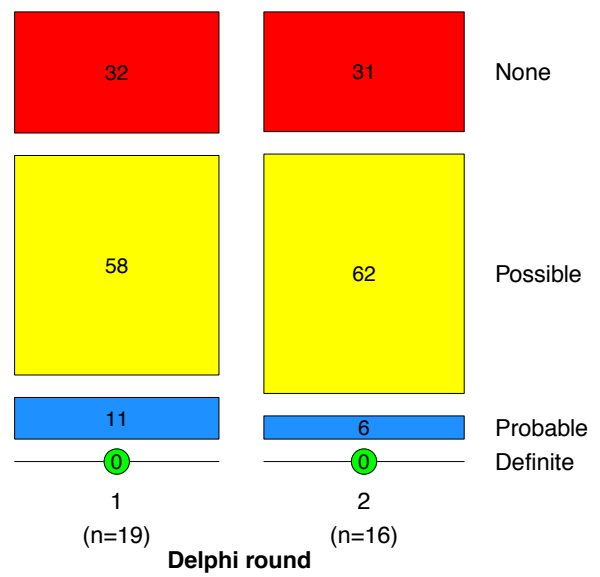

Rate the level of diagnostic certainty of:  
additional investigations only

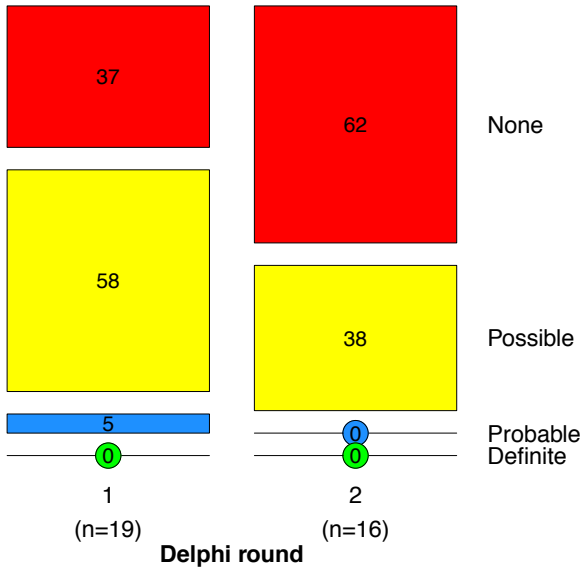

Supplement: jop-156-2337-s004.pdf [file jop-156-2337-s004.pdf]
