# Supplementary material for: Neuropathic pain phenotyping by international consensus (NeuroPPIC) for genetic studies: a NeuPSIG systematic review, Delphi survey, and expert panel recommendations
Source: PubMed Central journal article supplement (PMC4747983; doi:10.1097/j.pain.0000000000000335), 2015-10-22
Supplement: jop-156-2337-s005.pdf [file jop-156-2337-s005.pdf]

## **Supplementary Digital Content 5**

Figure. Delphi survey: level of agreement on other assessments to include when phenotyping (NP: neuropathic pain)

# Other measurements

(NP: neuropathic pain)

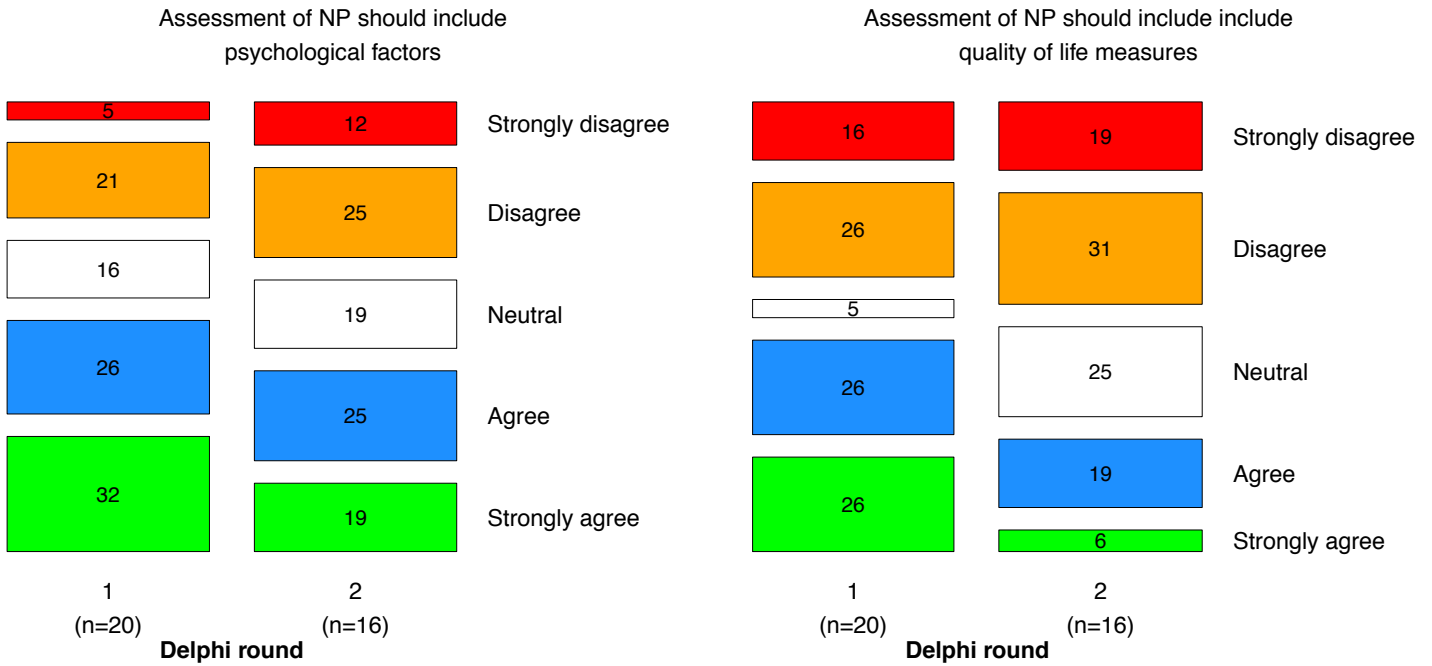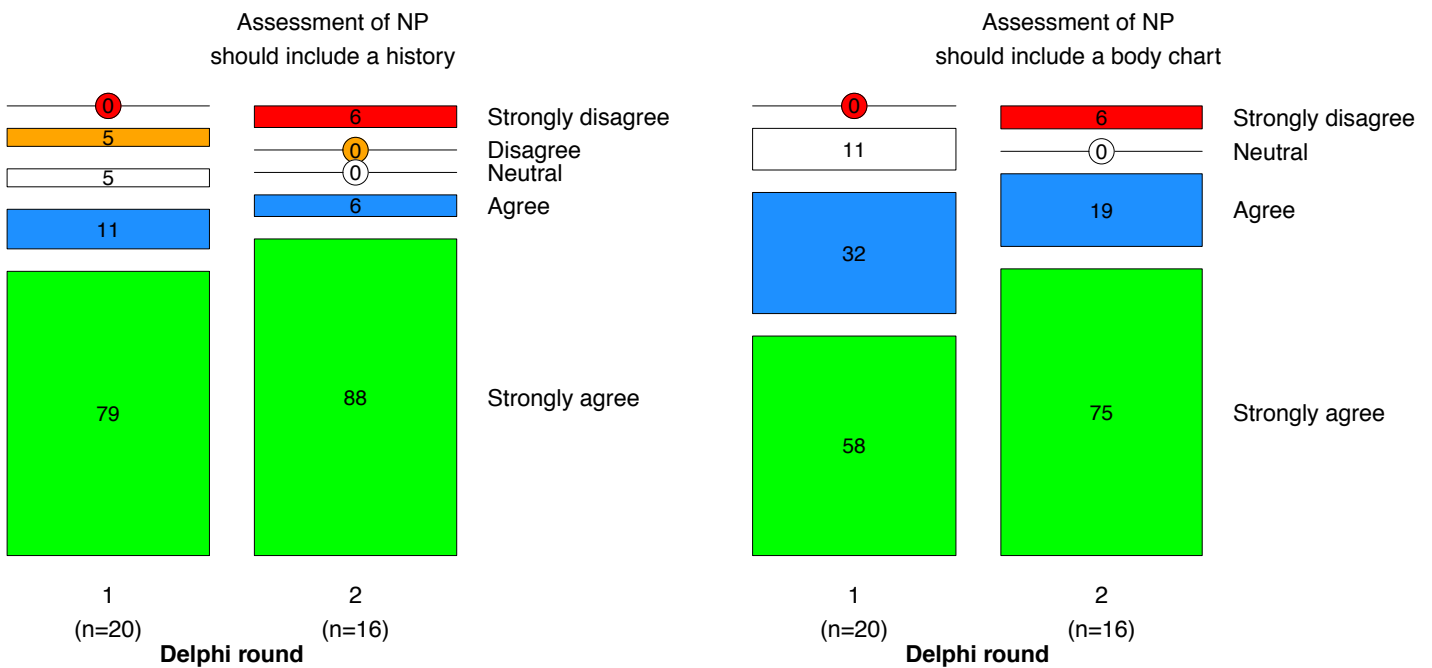

Numbers in the blocks report percent respondents choosing a category  
 Note: percentages may not match those presented in Table 4 because of rounding
