# Supplementary material for: Neuropathic pain phenotyping by international consensus (NeuroPPIC) for genetic studies: a NeuPSIG systematic review, Delphi survey, and expert panel recommendations
Source: PubMed Central journal article supplement (PMC4747983; doi:10.1097/j.pain.0000000000000335), 2015-10-22
Supplement: jop-156-2337-s006.pdf [file jop-156-2337-s006.pdf]

## **Supplementary Digital Content 6**

**Figure. Delphi survey: level of agreement on items to include in a patient history**

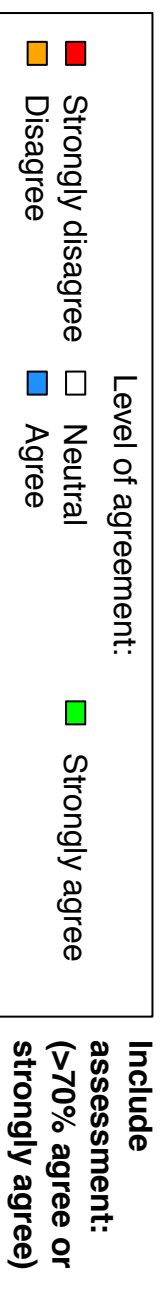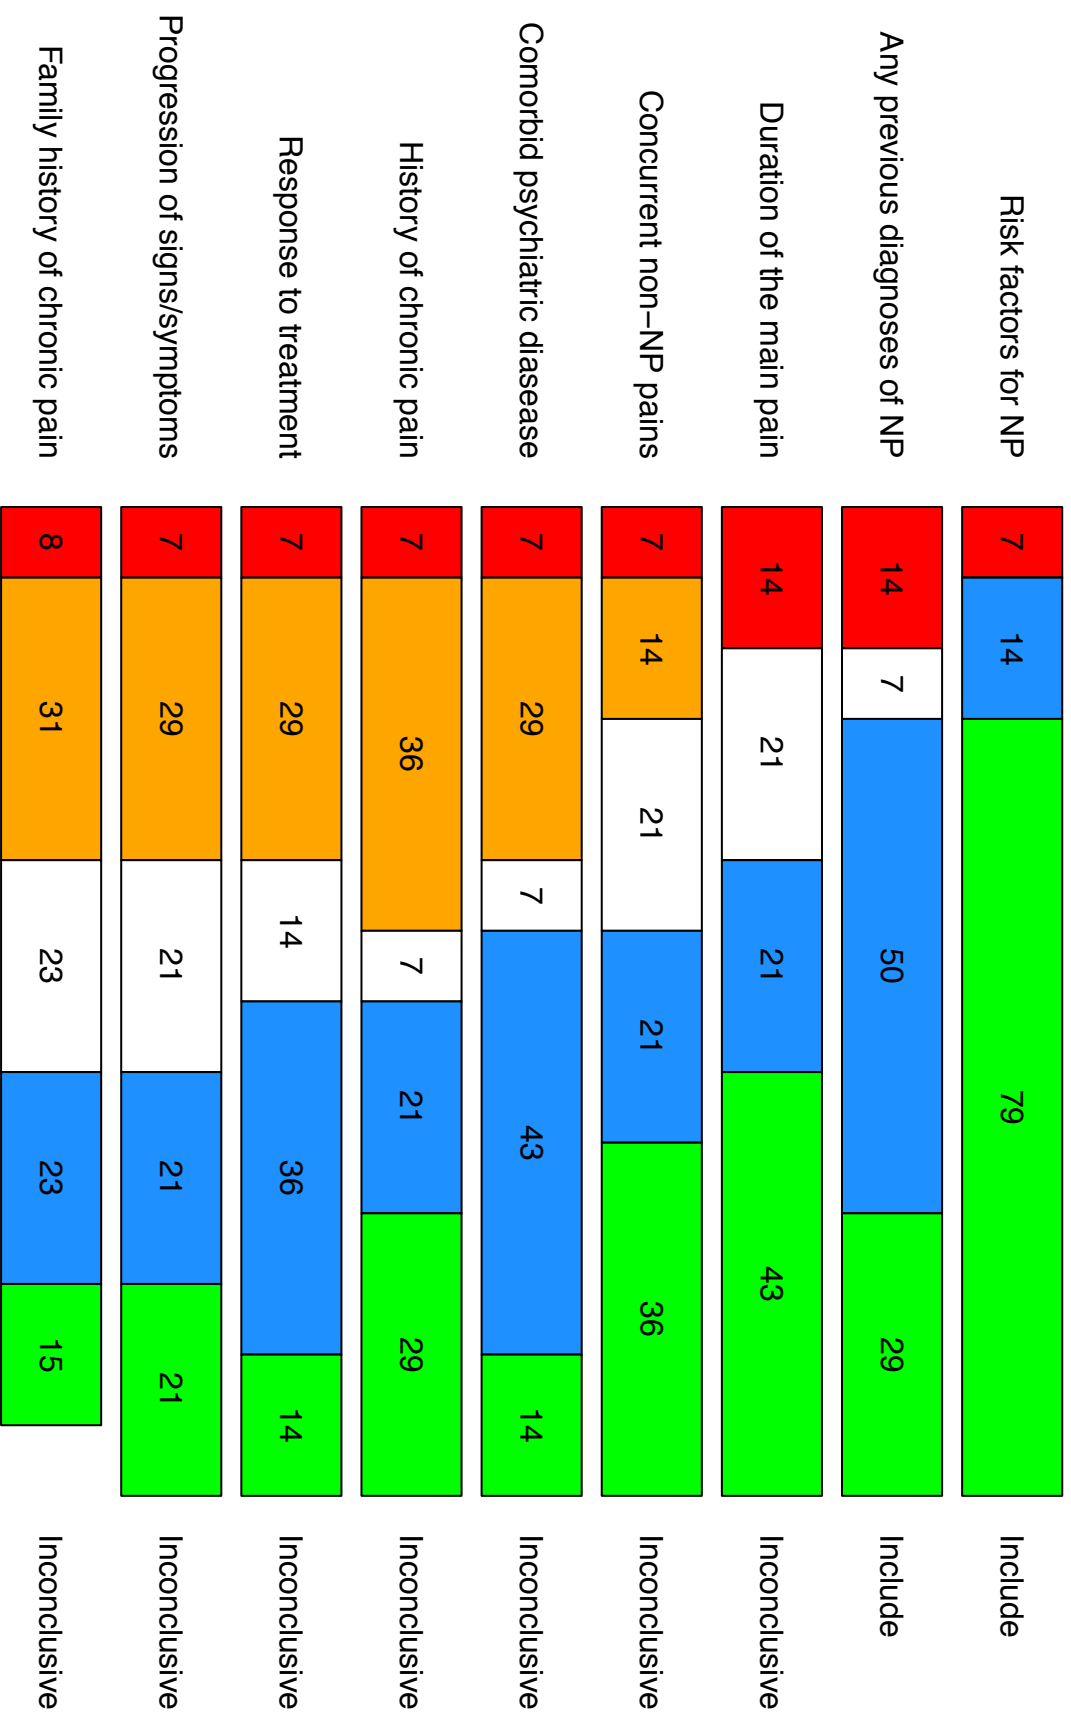

Number of responses (percentages shown in the blocks)
