# Supplementary material for: Neuropathic pain phenotyping by international consensus (NeuroPPIC) for genetic studies: a NeuPSIG systematic review, Delphi survey, and expert panel recommendations
Source: PubMed Central journal article supplement (PMC4747983; doi:10.1097/j.pain.0000000000000335), 2015-10-22
Supplement: jop-156-2337-s007.pdf [file jop-156-2337-s007.pdf]

## Supplementary Digital Content 7

### Box. Suggested additional phenotypes

#### MORE EXTENSIVE PHENOTYPING (*based on panel discussion*)

- Further demographic information
  - Income and educational level
  - Family history of chronic pain especially of neuropathic pain
  - Hand dominance
- Psychological profiling
  - Anxiety, depression, catastrophizing, somatization, post-traumatic pain disorder, personality
- Detailed pain characterisation
  - Temporal pattern of the pain (frequency, duration, changes in intensity)
  - Measures of unpleasantness and suffering
  - Analysis of multiple pain sites
  - Assessment of heat hyperalgesia
  - In-depth assessment of pain quality and intensity (e.g., neuropathic pain symptom inventory)
  - Interval between any inciting event and onset of pain
  - Further questionnaire tools to increase accuracy of diagnosis
  - Sleep disruption
  - Past and present pain treatments and their outcomes
- Smaller cohorts, depending on feasibility, may be further phenotyped by:
  - Clinical examination
  - Quantitative sensory testing
  - Intra-epidermal nerve fibre density
  - Test-retest to confirm reliability and stability of phenotype over time
